# Supplementary material
Source: PubMed Central journal article supplement (PMC10366950)
Supplement: jamaneurol-e232309-s001.pdf [file jamaneurol-e232309-s001.pdf]

## Supplementary Online Content

Elser H, Horváth-Puhó E, Gradus JL, et al. Association of early-, middle-, and late-life depression with incident dementia in a Danish cohort. *JAMA Neurol*. Published online July 24, 2023. doi:10.1001/jamaneurol.2023.2309

**eFigure 1.** Study Timeline and Length of Follow-Up for Study Subjects and Data Sources, 1977-2018

**eTable 1.** Diagnostic Codes From the *International Classification of Diseases, Eighth and Tenth Revisions (ICD-8 and ICD-10)*

**eTable 2.** Anatomical Therapeutic Chemical (ATC) Codes for Prescribed Antidepressants

**eFigure 2.** Flow Chart Depicting Exclusion Criteria for Patients Diagnosed with Depressive Disorders (Pane A) and Members of the Comparison Cohort (Panel B), 1977-2018

**eFigure 3.** Complementary Log-Log Plot for Proportional Hazards Assumption

**eTable 3.** Adjusted HR for Depression and Dementia by Treatment With Prescribed Antidepressant

**eTable 4.** Adjusted HR for Depression and Dementia by Frequency of Inpatient Encounters Among Those With a Depression Diagnosis

**eTable 5.** Adjusted HR for Depression and Dementia by Baseline Health Characteristics

**eTable 6.** Semi-Bayes Adjustment for Multiple Estimation

**eTable 7.** Adjusted HR for Depression and Dementia within Alternative Age Strata

**eTable 8.** Adjusted HR for Depression and Dementia for Inpatient and Outpatient Depression Diagnoses

**eTable 9.** Adjusted HR for Depression and Dementia by Year at Depression Diagnosis

**eTable 10.** Adjusted HR for Depression and Dementia by Dementia Subtypes

**eTable 11.** Adjusted HR for Depression and Dementia Restricted to Those Age  $\geq 45$  at Baseline

**eTable 12.** Adjusted HR for Depression and Dementia Including the First Year of Follow-Up

**eTable 13.** Adjusted HR for Depression and Dementia Without Censoring of Comparison Cohort Members

This supplementary material has been provided by the authors to give readers additional information about their work.

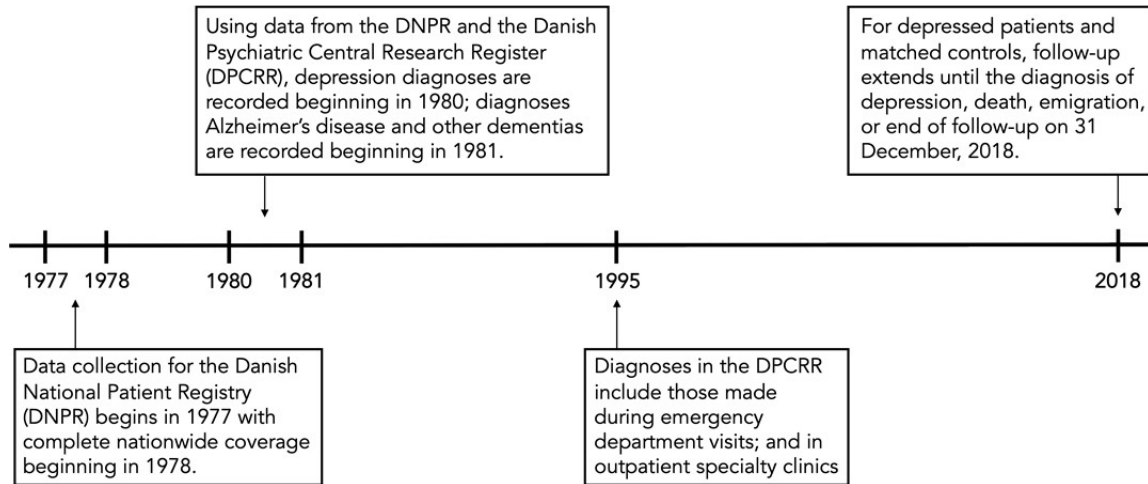

**eFigure 1.** Study timeline and length of follow-up for study subjects and data sources, 1977–2018

**eTable 1.** Diagnostic codes from the *International Classification of Diseases (ICD)*

| <b>Diagnosis</b>    | <b>Revision</b> | <b>ICD Code</b> |
|---------------------|-----------------|-----------------|
| Depression          | ICD-8           | 296.0           |
|                     | ICD-8           | 296.2           |
|                     | ICD-8           | 296.8           |
|                     | ICD-8           | 296.9           |
|                     | ICD-8           | 296.8           |
|                     | ICD-8           | 296.9           |
|                     | ICD-8           | 300.4           |
|                     | ICD-8           | 301.1           |
|                     | ICD-10          | F32.0           |
|                     | ICD-10          | F32.1           |
|                     | ICD-10          | F32.2           |
|                     | ICD-10          | F32.3           |
|                     | ICD-10          | F32.4           |
|                     | ICD-10          | F32.5           |
|                     | ICD-10          | F32.8           |
|                     | ICD-10          | F32.81          |
|                     | ICD-10          | F32.9           |
|                     | ICD-10          | F33*            |
|                     | ICD-10          | F34             |
|                     | ICD-10          | F39             |
| Alzheimer's Disease | ICD-8           | 290.09          |
|                     | ICD-8           | 290.10          |
|                     | ICD-10          | F00             |
|                     | ICD-10          | G30             |
| Vascular Dementia   | ICD-8           | 293.09          |
|                     | ICD-8           | 293.19          |
|                     | ICD-10          | F01             |
| Other Dementia      | ICD-8           | 094.19          |
|                     | ICD-8           | 292.09          |
|                     | ICD-8           | 290.11          |
|                     | ICD-8           | 290.18          |
|                     | ICD-8           | 290.19          |
|                     | ICD-10          | F02             |
|                     | ICD-10          | F03             |
|                     | ICD-10          | F10.73          |
|                     | ICD-10          | F11.73          |
|                     | ICD-10          | F12.73          |
|                     | ICD-10          | F13.73          |
|                     | ICD-10          | F14.73          |
|                     | ICD-10          | F15.73          |
|                     | ICD-10          | F16.73          |
|                     | ICD-10          | F17.73          |
|                     | ICD-10          | F18.73          |
|                     | ICD-10          | F19.73          |
| ICD-10              | G23.1           |                 |
| ICD-10              | G31.0           |                 |

|                              |        |        |
|------------------------------|--------|--------|
| Other Dementia               | ICD-10 | G31.1  |
|                              | ICD-10 | G31.8B |
|                              | ICD-10 | G31.8E |
|                              | ICD-10 | G31.85 |
| Cardiovascular Disease (CVD) | ICD-8  | 400    |
|                              | ICD-8  | 401    |
|                              | ICD-8  | 402    |
|                              | ICD-8  | 403    |
|                              | ICD-8  | 404    |
|                              | ICD-8  | 410    |
|                              | ICD-8  | 411    |
|                              | ICD-8  | 413    |
|                              | ICD-8  | 421    |
|                              | ICD-8  | 394    |
|                              | ICD-8  | 395    |
|                              | ICD-8  | 427.93 |
|                              | ICD-8  | 427.94 |
|                              | ICD-8  | 427.20 |
|                              | ICD-8  | 427.21 |
|                              | ICD-8  | 427.22 |
|                              | ICD-8  | 427.23 |
|                              | ICD-8  | 427.97 |
|                              | ICD-8  | 427.91 |
|                              | ICD-8  | 427.09 |
|                              | ICD-8  | 427.10 |
|                              | ICD-8  | 427.11 |
|                              | ICD-8  | 427.19 |
|                              | ICD-8  | 428.99 |
|                              | ICD-8  | 728.49 |
|                              | ICD-8  | 272.00 |
|                              | ICD-10 | I05    |
|                              | ICD-10 | I06    |
|                              | ICD-10 | I07    |
|                              | ICD-10 | I08    |
|                              | ICD-10 | I09    |
|                              | ICD-10 | I10    |
|                              | ICD-10 | I11    |
|                              | ICD-10 | I12    |
|                              | ICD-10 | I13    |
|                              | ICD-10 | I20    |
|                              | ICD-10 | I21    |
|                              | ICD-10 | I22    |
|                              | ICD-10 | I23    |
|                              | ICD-10 | I24    |
| ICD-10                       | I25    |        |
| ICD-10                       | I33    |        |
| ICD-10                       | I34    |        |
| ICD-10                       | I35    |        |
| ICD-10                       | I36    |        |

|                                              |        |        |
|----------------------------------------------|--------|--------|
| Cardiovascular Disease (CVD)                 | ICD-10 | I37    |
|                                              | ICD-10 | I39    |
|                                              | ICD-10 | I42    |
|                                              | ICD-q0 | I47    |
|                                              | ICD-10 | I48    |
|                                              | ICD-10 | I44    |
|                                              | ICD-10 | I45    |
|                                              | ICD-10 | I49    |
|                                              | ICD-10 | I50    |
|                                              | ICD-10 | E78.0  |
| Chronic Obstructive Pulmonary Disease (COPD) | ICD-8  | 490    |
|                                              | ICD-8  | 491    |
|                                              | ICD-8  | 492    |
|                                              | ICD-10 | J40    |
|                                              | ICD-10 | J41    |
|                                              | ICD-10 | J42    |
|                                              | ICD-10 | J43    |
|                                              | ICD-10 | J44    |
| Diabetes                                     | ICD-8  | 250    |
|                                              | ICD-8  | 251    |
|                                              | ICD-10 | E08    |
|                                              | ICD-10 | E09    |
|                                              | ICD-10 | E10    |
|                                              | ICD-10 | E11    |
|                                              | ICD-10 | E13    |
| Stroke                                       | ICD-8  | 430    |
|                                              | ICD-8  | 431    |
|                                              | ICD-8  | 433    |
|                                              | ICD-8  | 434    |
|                                              | ICD-8  | 435    |
|                                              | ICD-10 | I60    |
|                                              | ICD-10 | I61    |
|                                              | ICD-10 | I63    |
|                                              | ICD-10 | I64    |
|                                              | ICD-10 | G45.9  |
| Head Injuries                                | ICD-8  | N800   |
|                                              | ICD-8  | N801   |
|                                              | ICD-8  | N803   |
|                                              | ICD-8  | N804   |
|                                              | ICD-8  | N850   |
|                                              | ICD-8  | N851   |
|                                              | ICD-8  | N852   |
|                                              | ICD-8  | N853   |
|                                              | ICD-8  | N854   |
|                                              | ICD-10 | S02.0  |
|                                              | ICD-10 | S02.1X |
|                                              | ICD-10 | S02.8  |
|                                              | ICD-10 | S02.91 |
| ICD-10                                       | S04.02 |        |

|                         |        |         |
|-------------------------|--------|---------|
| Head Injuries           | ICD-10 | S04.03X |
|                         | ICD-10 | S04.04X |
|                         | ICD-10 | S06.X   |
|                         | ICD-10 | S07.1   |
| Anxiety Disorders       | ICD-8  | 300     |
|                         | ICD-8  | 305.9   |
|                         | ICD-8  | 305.68  |
|                         | ICD-8  | 307.99  |
|                         | ICD-10 | F40     |
|                         | ICD-10 | F41     |
|                         | ICD-10 | F42     |
|                         | ICD-10 | F44     |
| Stress Disorders        | ICD-8  | 308     |
|                         | ICD-10 | F43     |
| Bipolar Disorder        | ICD-8  | 296.1   |
|                         | ICD-8  | 296.3   |
|                         | ICD-10 | F31     |
| Substance Use Disorders | ICD-8  | 291     |
|                         | ICD-8  | 303     |
|                         | ICD-8  | 304     |
|                         | ICD-10 | F10     |
|                         | ICD-10 | F11     |
|                         | ICD-10 | F12     |
|                         | ICD-10 | F13     |
|                         | ICD-10 | F14     |
|                         | ICD-10 | F15     |
|                         | ICD-10 | F16     |
|                         | ICD-10 | F17     |
| Personality Disorders   | ICD-8  | 301     |
|                         | ICD-10 | F60     |
|                         | ICD-10 | F69     |
| Suicide Attempt         | ICD-8  | E950    |
|                         | ICD-8  | E951    |
|                         | ICD-8  | E952    |
|                         | ICD-8  | E953    |
|                         | ICD-8  | E954    |
|                         | ICD-8  | E955    |
|                         | ICD-8  | E956    |
|                         | ICD-8  | E957    |
|                         | ICD-8  | E958    |
|                         | ICD-8  | E959    |
|                         | ICD-10 | X60     |
|                         | ICD-10 | X61     |
|                         | ICD-10 | X62     |
|                         | ICD-10 | X63     |
| ICD-10                  | X64    |         |

|                 |        |     |
|-----------------|--------|-----|
| Suicide Attempt | ICD-10 | X65 |
|                 | ICD-10 | X66 |
|                 | ICD-10 | X67 |
|                 | ICD-10 | X68 |
|                 | ICD-10 | X69 |
|                 | ICD-10 | X70 |
|                 | ICD-10 | X71 |
|                 | ICD-10 | X72 |
|                 | ICD-10 | X73 |
|                 | ICD-10 | X74 |
|                 | ICD-10 | X75 |
|                 | ICD-10 | X76 |
|                 | ICD-10 | X77 |
|                 | ICD-10 | X78 |
|                 | ICD-10 | X79 |
|                 | ICD-10 | X80 |
|                 | ICD-10 | X81 |
|                 | ICD-10 | X82 |
| ICD-10          | X83    |     |
| ICD-10          | X84    |     |

**eTable 2.** Anatomical Therapeutic Chemical (ATC) codes for prescribed antidepressants

| <b>ATC Code</b> | <b>Generic Name</b> |
|-----------------|---------------------|
| N06AA01         | Despiramine         |
| N06AA02         | Imipramine          |
| N06AA03         | Imipramine oxide    |
| N06AA04         | Clomipramine        |
| N06AA05         | Opipramol           |
| N06AA06         | Trimipramine        |
| N06AA07         | Lofepramine         |
| N06AA08         | Dibenzapin          |
| N06AA09         | Amitriptyline       |
| N06AA10         | Nortriptyline       |
| N06AA11         | Protriptyline       |
| N06AA12         | Doxepin             |
| N06AA13         | Iprindole           |
| N06AA14         | Melitracen          |
| N06AA15         | Butriptyline        |
| N06AA16         | Dosulepin           |
| N06AA17         | Amoxapine           |
| N06AA18         | Dimetracine         |
| N06AA19         | Amineptine          |
| N06AA21         | Maprotiline         |
| N06AA23         | Quinupramine        |
| N06AB02         | Zimeldine           |
| N06AB03         | Fluoxetine          |
| N06AB04         | Citalopram          |
| N06AB05         | Paroxetine          |
| N06AB06         | Sertraline          |
| N06AB07         | Alaproclate         |
| N06AB08         | Fluvoxamine         |
| N06AB09         | Eteperidone         |
| N06AB10         | Escitalopram        |
| N06AF01         | Isocarboxazid       |
| N06AF02         | Nialamide           |
| N06AF03         | Phenelzine          |
| N06AF04         | Tranlycypromine     |
| N06AF05         | Iproniazide         |
| N06AF06         | Iproclozide         |
| N06AG02         | Moclobemide         |
| N06AG03         | Toloxatone          |
| N06AX01         | Oxatriptan          |
| N06AX02         | Tryptophan          |
| N06AX03         | Mianserin           |
| N06AX04         | Nomifensine         |
| N06AX05         | Trazodone           |
| N06AX07         | Nefazodone          |
| N06AX08         | Bifemalane          |
| N06AX09         | Viloxazine          |



|         |                 |
|---------|-----------------|
| N06AX10 | Oxaflozane      |
| N06AX11 | Mirtazapine     |
| N06AX12 | Bupropion       |
| N06AX13 | Medifoxamine    |
| N06AX14 | Tianeptine      |
| N06AX15 | Pivagabine      |
| N06AX16 | Venlafaxine     |
| N06AX17 | Milnacipran     |
| N06AX18 | Reboxetine      |
| N06AX19 | Gepirone        |
| N06AX21 | Duloxetine      |
| N06AX22 | Agomelatine     |
| N06AX23 | Desvenlafaxine  |
| N06AX24 | Vilazodone      |
| N06AX25 | Hyperici Herba  |
| N06AX26 | Vortioxetine    |
| N06AX27 | Esketamine      |
| N06AX28 | Levomilnacipran |
| N06AX29 | Brexanolone     |

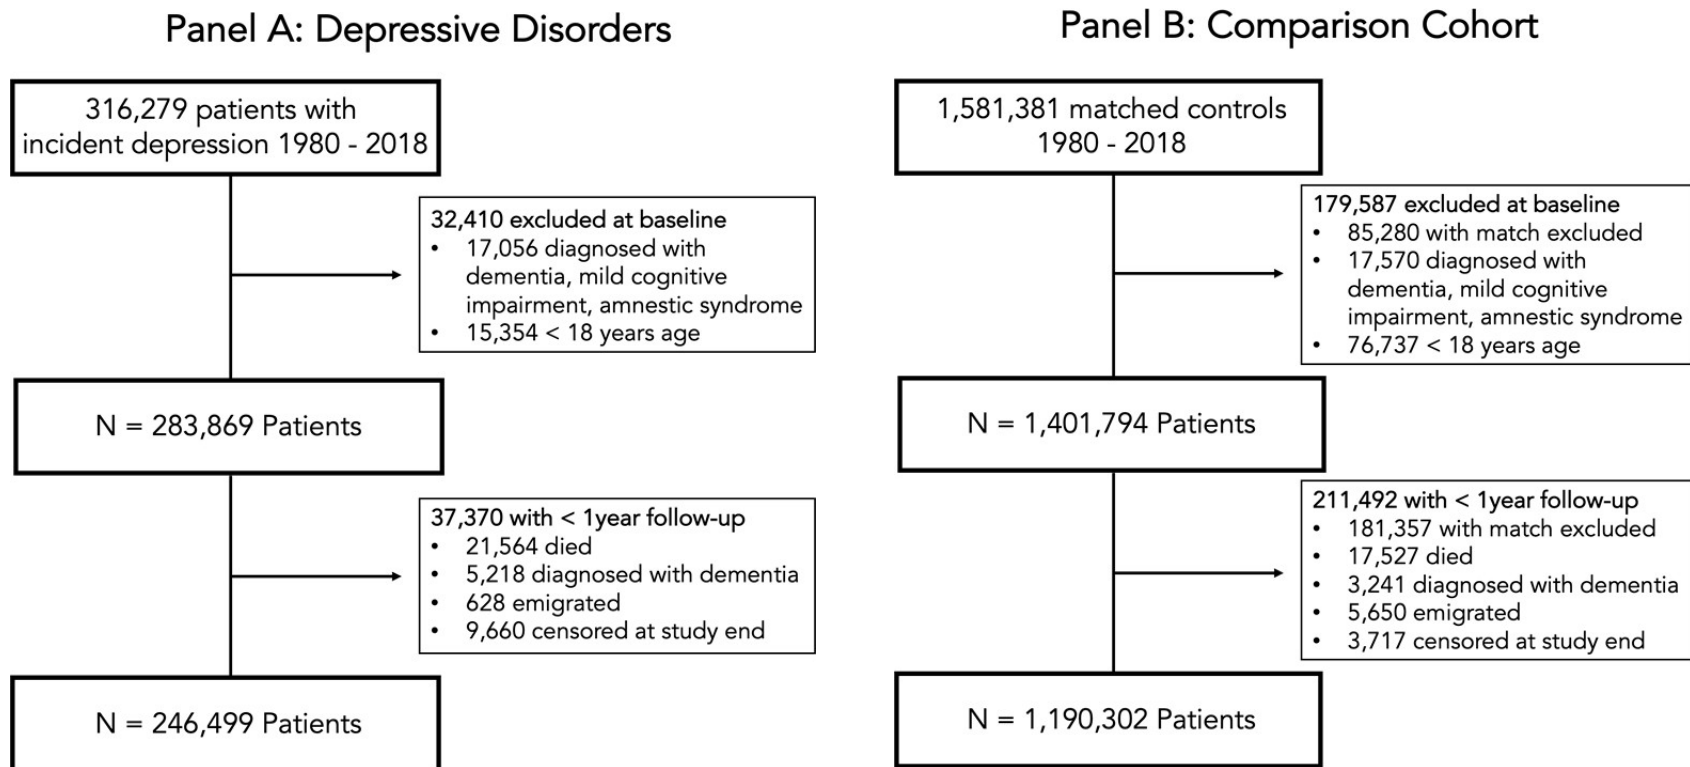

**eFigure 2.** Flow chart depicting exclusion criteria for patients diagnosed with depressive disorders (Panel A) and members of the comparison cohort (Panel B), 1977 – 2018.

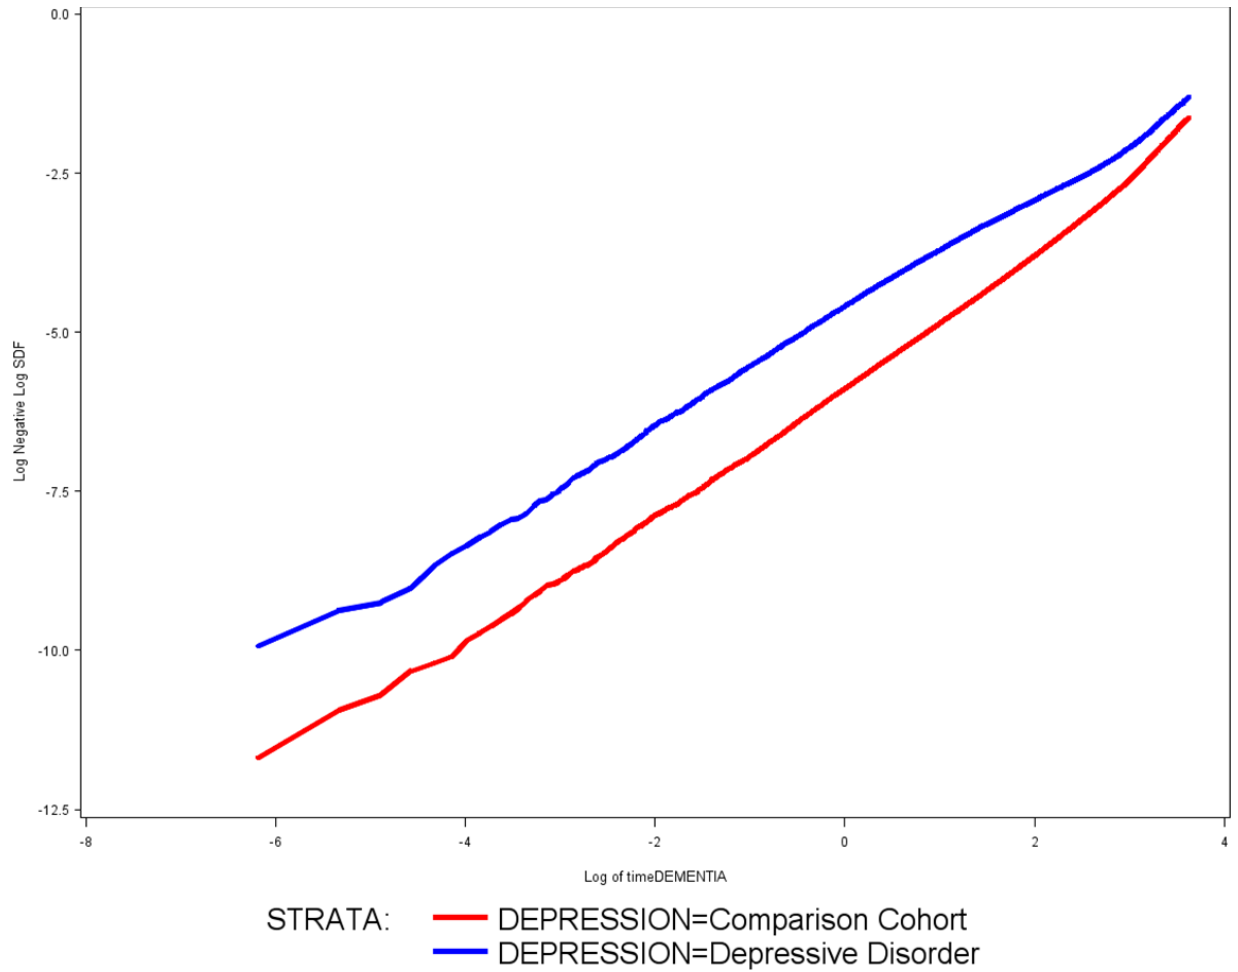

**eFigure 3.** Complementary log-log plot for proportional hazards assumption. The logarithm of the negative logarithm of the estimated survivor function is plotted against the logarithm of survival time. If the assumption of proportional hazards is satisfied, this plot will yield curves that do not cross.

**eTable 3.** Adjusted HR for depression and dementia by treatment with a prescribed antidepressant

|                                 | Depression Diagnosis |             |                            | Comparison Cohort |             |                            | HR (95% CI) <sup>2</sup> | p-value |
|---------------------------------|----------------------|-------------|----------------------------|-------------------|-------------|----------------------------|--------------------------|---------|
|                                 | Events               | No. at Risk | Risk (95% CI) <sup>1</sup> | Events            | No. at Risk | Risk (95% CI) <sup>1</sup> |                          |         |
| <b>Treatment<sup>3</sup></b>    |                      |             |                            |                   |             |                            |                          |         |
| 1 – 10 years                    | 9,075                | 194,353     | 5.70 (5.59,5.82)           | 19,996            | 935,663     | 2.81 (2.77,2.84)           | 2.54 (2.47,2.62)         | <0.001  |
| > 10 – 20 years                 | 1,762                | 71,427      | 4.44 (4.22,4.67)           | 7,665             | 396,688     | 3.42 (3.34,3.50)           | 1.86 (1.73,1.99)         | <0.001  |
| > 20 – 39 years                 | 114                  | 9,846       | 2.56 (2.01,3.21)           | 503               | 60,264      | 1.72 (1.49,1.96)           | 2.20 (1.63,2.96)         | <0.001  |
| 1 – 39 years                    | 10,951               | 194,353     | 10.21 (9.85,10.59)         | 28,164            | 935,663     | 6.81 (6.64,6.99)           | 2.42 (2.35,2.49)         | <0.001  |
| <b>No Treatment<sup>3</sup></b> |                      |             |                            |                   |             |                            |                          |         |
| 1 – 10 years                    | 1,699                | 52,146      | 3.95 (3.76,4.14)           | 3,424             | 254,639     | 1.72 (1.66,1.78)           | 2.83 (2.63,3.05)         | <0.001  |
| > 10 – 20 years                 | 875                  | 23,869      | 4.70 (4.40,5.01)           | 4,032             | 137,656     | 3.71 (3.59,3.82)           | 1.93 (1.74,2.15)         | <0.001  |
| > 20 – 39 years                 | 475                  | 9,360       | 9.76 (8.68,10.9)           | 3,032             | 63,306      | 9.26 (8.85,9.69)           | 1.71 (1.49,1.97)         | <0.001  |
| 1 – 39 years                    | 3,049                | 52,146      | 12.1 (11.5, 12.7)          | 10,488            | 254,639     | 10.8 (10.5,11.1)           | 2.35 (2.22,2.48)         | <0.001  |

1. Risk was calculated separately for individuals with depression and members of the comparison cohort using cumulative incidence functions that treated death as a competing risk.

2. We used stratified Cox proportional hazards regression models to compute hazard ratios (HR) for the association between depression and dementia. Variables were chosen for adjustment based on current knowledge regarding common causes of depression and dementia, and restricted to those measured before depression diagnosis, including education, income, CVD, COPD, diabetes, anxiety disorders, stress disorders, substance use disorders, and bipolar disorder.

3. Treatment was defined based on prescription for an antidepressant in the six months before or the six months after the date of depression diagnosis. Antidepressants were identified from the Danish National Prescription Registry using anatomic therapeutic chemical (ATC) codes.

**eTable 4.** Adjusted HR for the frequency of inpatient hospitalizations and dementia among those with a baseline depression diagnosis<sup>1</sup>

| <b>Inpatient Visits</b> | <b>Number<sup>2</sup></b> | <b>HR (95% CI)<sup>3</sup></b> | <b>p-value</b> |
|-------------------------|---------------------------|--------------------------------|----------------|
| One                     | 113,629                   | 1 (Ref)                        | --             |
| Two                     | 45,707                    | 1.33 (1.21,1.46)               | <0.001         |
| Three                   | 23,949                    | 1.62 (1.43,1.83)               | <0.001         |
| Four or more            | 14,399                    | 1.49 (1.39,1.60)               | <0.001         |

1. Analysis was restricted to individuals with at least one inpatient depression diagnosis (N=113,629). The number of inpatient visits was treated as a time-varying exposure.

2. Reflects the number of individuals with one, two, three, or four or more inpatient depression diagnoses over the course of the study period.

3. We used Cox proportional hazards regression models to compute hazard ratios (HR) for the association between depression and dementia. Variables were chosen for adjustment based on current knowledge regarding common causes of depression and dementia, and restricted to those measured before depression diagnosis, including age, sex, calendar year, education, income, CVD, COPD, diabetes, anxiety disorders, stress disorders, substance use disorders, and bipolar disorder.

**eTable 5.** Adjusted HR for depression and dementia by baseline health characteristics<sup>1</sup>

|                                                     | <b>Depression Diagnosis</b><br>Risk (95% CI) | <b>Comparison Cohort</b><br>Risk (95% CI) | <b>HR (95% CI)</b> | <b>p-value</b> |
|-----------------------------------------------------|----------------------------------------------|-------------------------------------------|--------------------|----------------|
| <b>Cardiovascular Disease (CVD)</b>                 |                                              |                                           |                    |                |
| No                                                  | 13.0 (12.4,13.8)                             | 11.3 (11.1,11.6)                          | 2.51 (2.43,2.59)   | <0.001         |
| Yes                                                 | 16.1 (15.2,17.0)                             | 13.6 (12.9,14.4)                          | 2.18 (2.06,2.31)   | <0.001         |
| <b>Chronic Obstructive Pulmonary Disease (COPD)</b> |                                              |                                           |                    |                |
| No                                                  | 13.7 (13.1,14.3)                             | 11.6 (11.3,11.8)                          | 2.41 (2.35,2.47)   | <0.001         |
| Yes                                                 | 11.0 (10.0,12.1)                             | 9.67 (8.50,10.9)                          | 1.99 (1.46,2.73)   | <0.001         |
| <b>Stroke</b>                                       |                                              |                                           |                    |                |
| No                                                  | 13.4 (12.8,14.1)                             | 11.5 (11.2,11.7)                          | 2.47 (2.40,2.53)   | <0.001         |
| Yes                                                 | 16.5 (15.2,18.0)                             | 14.4 (13.3,15.6)                          | 1.82 (1.52,2.19)   | <0.001         |
| <b>Anxiety Disorder</b>                             |                                              |                                           |                    |                |
| No                                                  | 13.6 (13.0,14.2)                             | 11.5 (11.2,11.8)                          | 2.42 (2.36,2.48)   | <0.001         |
| Yes                                                 | 13.8 (11.4,16.4)                             | 11.8 (8.65,15.4)                          | 1.83 (0.63,5.27)   | 0.26           |
| <b>Substance Use Disorder</b>                       |                                              |                                           |                    |                |
| No                                                  | 14.0 (13.4,14.7)                             | 11.6 (11.3,11.8)                          | 2.42 (2.36,2.48)   | <0.001         |
| Yes                                                 | 9.39 (8.27,10.6)                             | 8.94 (6.77,11.5)                          | 1.55 (1.01,2.37)   | 0.04           |
| <b>Head Injuries</b>                                |                                              |                                           |                    |                |
| No                                                  | 13.7 (13.1,14.3)                             | 11.5 (12.3,11.8)                          | 2.40 (2.34,2.56)   | <0.001         |
| Yes                                                 | 14.0 (9.98,18.7)                             | 9.80 (7.21,12.9)                          | 3.76 (2.30,6.13)   | <0.001         |

1. Baseline sociodemographic and health characteristics were measured two years prior to the onset of depression beginning beginning in January 1, 1978.
2. Risk was calculated separately for individuals with depression and members of the comparison cohort using cumulative incidence functions that treated death as a competing risk.
3. We used Cox proportional hazards regression models to compute hazard ratios (HR) for the association between depression and dementia. Variables were chosen for adjustment based on current knowledge regarding common causes of depression and dementia, and restricted to those measured before depression diagnosis, including age, sex, calendar year, education, income, CVD, COPD, diabetes, anxiety disorders, stress disorders, substance use disorders, and bipolar disorder.

**eTable 6.** Semi-Bayes adjustment for multiple estimation

|                      | All Participants        |                           | Women                   |                           | Men                     |                           |
|----------------------|-------------------------|---------------------------|-------------------------|---------------------------|-------------------------|---------------------------|
|                      | Original<br>HR (95% CI) | Semi-Bayes<br>HR (95% CI) | Original<br>HR (95% CI) | Semi-Bayes<br>HR (95% CI) | Original<br>HR (95% CI) | Semi-Bayes<br>HR (95% CI) |
| <b>18 – 44 Years</b> |                         |                           |                         |                           |                         |                           |
| 1 – 10 years         | 4.45 (2.42,5.79)        | 4.09 (2.12,5.36)          | 4.50 (3.09,6.55)        | 3.88 (2.75,5.46)          | 4.59 (3.11,6.75)        | 3.91 (2.76,5.54)          |
| > 10 – 20 years      | 2.94 (2.27,3.82)        | 2.89 (2.21,3.78)          | 3.29 (2.28,4.75)        | 3.10 (2.21,4.34)          | 2.50 (1.70,3.68)        | 2.54 (1.79,3.59)          |
| > 20 – 39 years      | 2.15 (1.62,2.86)        | 2.23 (1.68,2.96)          | 1.92 (1.34,2.76)        | 2.08 (1.49,2.91)          | 2.91 (1.77,4.78)        | 2.79 (1.87,4.18)          |
| 1 – 39 years         | 3.08 (2.64,3.58)        | 3.05 (2.52,3.69)          | 2.94 (2.40,3.61)        | 2.91 (2.31,3.66)          | 3.30 (2.62,4.17)        | 3.21 (2.50,4.11)          |
| <b>45 – 59 Years</b> |                         |                           |                         |                           |                         |                           |
| 1 – 10 years         | 4.72 (4.22,5.72)        | 4.63 (2.93,5.45)          | 4.26 (3.62,5.00)        | 4.13 (3.39,5.02)          | 5.21 (4.46,6.09)        | 5.00 (4.12,6.06)          |
| > 10 – 20 years      | 2.37 (2.12,2.66)        | 2.38 (2.02,2.80)          | 2.45 (2.12,2.84)        | 2.46 (2.05,2.96)          | 2.25 (1.87,2.71)        | 2.28 (1.84,2.82)          |
| > 20 – 29 years      | 1.73 (1.46,2.05)        | 1.78 (1.46,2.18)          | 1.65 (1.36,2.01)        | 1.72 (1.38,2.15)          | 2.18 (1.52,3.11)        | 2.28 (1.64,3.17)          |
| 1 – 29 years         | 2.95 (2.75,3.17)        | 2.95 (2.56,3.39)          | 2.66 (2.42,2.92)        | 2.66 (2.29,3.10)          | 3.45 (3.08,3.85)        | 3.42 (2.90,4.02)          |
| <b>60+ Years</b>     |                         |                           |                         |                           |                         |                           |
| 1 – 10 years         | 2.46 (2.39,2.53)        | 2.46 (2.17,2.78)          | 2.28 (2.21,2.36)        | 2.28 (2.01,2.59)          | 3.00 (2.84,3.16)        | 2.99 (2.62,3.42)          |
| > 10 – 20 years      | 1.65 (1.53,1.77)        | 1.66 (1.44,1.91)          | 1.54 (1.42,1.67)        | 1.56 (1.35,1.80)          | 2.09 (1.79,2.44)        | 2.12 (1.75,2.57)          |
| > 20 – 39 years      | 1.73 (1.31,2.28)        | 1.85 (1.40,2.45)          | 1.86 (1.38,2.51)        | 1.99 (1.48,2.67)          | 1.26 (0.58,2.73)        | 1.98 (1.21,3.24)          |
| 1 – 39 years         | 2.31 (2.25,2.38)        | 2.31 (2.05,2.62)          | 2.14 (2.08,2.21)        | 2.15 (1.90,2.43)          | 2.86 (2.72,3.01)        | 2.86 (2.51,3.26)          |

1. We used stratified Cox proportional hazards regression models to compute hazard ratios (HR) for the association between depression and dementia. Variables were chosen for adjustment based on current knowledge regarding common causes of depression and dementia, and restricted to those measured before depression diagnosis, including education, income, CVD, COPD, diabetes, anxiety disorders, stress disorders, substance use disorders, and bipolar disorder.

2. Semi-Bayes shrinkage narrows the distribution of observed (conventional) hazard ratios and improves their precision by applying a shrinkage estimator derived from regression methods. Imprecisely measured estimates that are substantially above or below the null value (HR=1.00), are attenuated.

**eTable 7.** Adjusted HR for depression and dementia within alternative age strata

|                      | Depressive Disorders |             |                            | Comparison Cohort |             |                            | HR (95% CI) <sup>2</sup> | p-value |
|----------------------|----------------------|-------------|----------------------------|-------------------|-------------|----------------------------|--------------------------|---------|
|                      | Events               | No. at Risk | Risk (95% CI) <sup>1</sup> | Events            | No. at Risk | Risk (95% CI) <sup>1</sup> |                          |         |
| <b>18 – 29 Years</b> |                      |             |                            |                   |             |                            |                          |         |
| 1 – 10 years         | 16                   | 47,079      | 0.05 (0.03,0.08)           | 14                | 230,903     | 0.01 (0.01,0.02)           | 5.21 (2.05,13.2)         | <0.001  |
| > 10 – 20 years      | 8                    | 20,051      | 0.07 (0.03,0.14)           | 12                | 96,023      | 0.02 (0.01,0.04)           | 3.57 (0.93,13.7)         | 0.06    |
| > 20 – 39 years      | 10                   | 3,546       | 1.73 (0.87,3.10)           | 15                | 17,925      | 0.56 (0.29,0.99)           | 4.52 (1.31,15.6)         | 0.02    |
| 1 – 39 years         | 34                   | 47,079      | 1.75 (0.93,3.03)           | 41                | 230,903     | 0.58 (0.31,1.00)           | 4.85 (2.73,8.60)         | <0.001  |
| <b>30 – 39 Years</b> |                      |             |                            |                   |             |                            |                          |         |
| 1 – 10 years         | 82                   | 41,161      | 0.25 (0.20,0.31)           | 49                | 203,965     | 0.03 (0.02,0.04)           | 5.41 (3.44,8.51)         | <0.001  |
| > 10 – 20 years      | 70                   | 20,980      | 0.60 (0.47,0.77)           | 90                | 106,139     | 0.16 (0.12,0.19)           | 3.02 (2.04,4.46)         | <0.001  |
| > 20 – 29 years      | 47                   | 4,928       | 4.52 (3.13,6.27)           | 120               | 27,365      | 2.49 (1.94,3.14)           | 2.19 (1.44,3.35)         | <0.001  |
| 1 – 29 years         | 199                  | 41,161      | 4.77 (3.53,6.28)           | 259               | 203,965     | 2.58 (2.05,3.21)           | 3.10 (2.45,3.90)         | <0.001  |
| <b>40 – 49 Years</b> |                      |             |                            |                   |             |                            |                          |         |
| 1 – 10 years         | 258                  | 42,074      | 0.78 (0.69,0.88)           | 239               | 208,861     | 0.16 (0.14,0.18)           | 4.20 (3.40,5.18)         | <0.001  |
| > 10 – 20 years      | 187                  | 20,664      | 1.58 (1.36,1.83)           | 296               | 110,188     | 0.48 (0.42,0.54)           | 2.95 (2.35,3.71)         | <0.001  |
| > 20 – 39 years      | 141                  | 5,273       | 12.2 (9.18,15.7)           | 508               | 32,715      | 8.55 (7.47,9.72)           | 2.12 (1.64,2.74)         | <0.001  |
| 1 – 39 years         | 586                  | 42,074      | 11.2 (8.94,13.8)           | 1,043             | 208,861     | 8.31 (7.34,9.36)           | 3.02 (2.65,3.44)         | <0.001  |
| <b>50 – 59 Years</b> |                      |             |                            |                   |             |                            |                          |         |
| 1 – 10 years         | 750                  | 36,660      | 2.56 (2.38,2.75)           | 634               | 181,059     | 0.46 (0.43,0.50)           | 4.87 (4.30,5.52)         | <0.001  |
| > 10 – 20 years      | 554                  | 16,656      | 5.52 (5.06,6.01)           | 1,257             | 96,060      | 2.25 (2.13,2.39)           | 2.27 (2.01,2.58)         | <0.001  |
| > 20 – 39 years      | 221                  | 3,748       | 17.3 (14.8,20.0)           | 1,290             | 26,834      | 17.3 (16.1,18.5)           | 1.61 (1.32,1.97)         | <0.001  |
| 1 – 39 years         | 1,525                | 36,660      | 16.3 (14.8,17.7)           | 3,181             | 181,059     | 15.8 (14.9,16.7)           | 2.92 (2.70,3.16)         | <0.001  |
| <b>60+ Years</b>     |                      |             |                            |                   |             |                            |                          |         |
| 1 – 10 years         | 9,668                | 79,525      | 14.0 (13.7,14.2)           | 22,484            | 365,514     | 7.54 (7.45,7.64)           | 2.46 (2.39,2.53)         | <0.001  |
| > 10 – 20 years      | 1,818                | 16,945      | 14.6 (14.0,15.3)           | 10,042            | 125,934     | 11.4 (11.2,11.6)           | 1.65 (1.53,1.77)         | <0.001  |
| > 20 – 39 years      | 170                  | 1,711       | 16.4 (14.0,18.9)           | 1,602             | 18,731      | 15.5 (14.7,16.3)           | 1.73 (1.31,2.28)         | <0.001  |
| 1 – 39 years         | 11,656               | 79,525      | 20.1 (19.8,20.5)           | 34,128            | 365,514     | 17.3 (17.1,17.5)           | 2.31 (2.25,2.38)         | <0.001  |

Risk was calculated separately for individuals with depression and members of the comparison cohort using cumulative incidence functions that treated death as a competing risk.

We used stratified Cox proportional hazards regression models to compute hazard ratios (HR) for the association between depression and dementia. Variables were chosen for adjustment based on current knowledge regarding common causes of depression and dementia, and restricted to those measured before depression diagnosis, including education, income, CVD, COPD, diabetes, anxiety disorders, stress disorders, substance use disorders, and bipolar disorder.



**eTable 8.** Adjusted HR for depression and dementia for inpatient and outpatient depression diagnoses

|                   | Depressive Disorders |             |                            | Comparison Cohort |             |                            | HR (95% CI) <sup>2</sup> | p-value |
|-------------------|----------------------|-------------|----------------------------|-------------------|-------------|----------------------------|--------------------------|---------|
|                   | Events               | No. at Risk | Risk (95% CI) <sup>1</sup> | Events            | No. at Risk | Risk (95% CI) <sup>1</sup> |                          |         |
| <b>Inpatient</b>  |                      |             |                            |                   |             |                            |                          |         |
| 1 – 10 years      | 5,797                | 113,629     | 5.82 (5.67,5.97)           | 13,776            | 546,296     | 3.02 (2.97,3.07)           | 2.34 (2.25,2.43)         | <0.001  |
| > 10 – 20 years   | 1,704                | 46,843      | 5.28 (5.03,5.54)           | 7,736             | 278,952     | 4.07 (3.98,4.16)           | 1.95 (1.81,2.10)         | <0.001  |
| > 20 – 39 years   | 503                  | 11,717      | 9.81 (8.73,11.0)           | 3,165             | 81,080      | 9.23 (8.81,9.65)           | 1.77 (1.54,2.03)         | <0.001  |
| 1 – 39 years      | 8,004                | 113,629     | 13.3 (12.8,13.8)           | 24,677            | 546,296     | 11.9 (11.6,12.1)           | 2.22 (2.15,2.29)         | <0.001  |
| <b>Outpatient</b> |                      |             |                            |                   |             |                            |                          |         |
| 1 – 10 years      | 4,977                | 132,870     | 4.81 (4.68,4.94)           | 9,644             | 644,006     | 2.11 (2.06–2.15)           | 2.91 (2.80,3.03)         | <0.001  |
| > 10 – 20 years   | 933                  | 48,453      | 3.66 (3.41,3.93)           | 3,961             | 255,392     | 2.82 (2.72–2.91)           | 1.77 (1.61,1.95)         | <0.001  |
| > 20 – 39 years   | 86                   | 7,489       | 11.1 (4.39,21.5)           | 370               | 42,490      | 13.6 (2.11–35.6)           | 1.98 (1.38,2.84)         | <0.001  |
| 1 – 39 years      | 5,996                | 132,870     | 14.7 (9.76,20.5)           | 13,975            | 644,006     | 14.4 (4.6–29.6)            | 2.68 (2.58,2.78)         | <0.001  |

1. Risk was calculated separately for individuals with depression and members of the comparison cohort using cumulative incidence functions that treated death as a competing risk.

2. We used stratified Cox proportional hazards regression models to compute hazard ratios (HR) for the association between depression and dementia. Variables were chosen for adjustment based on current knowledge regarding common causes of depression and dementia, and restricted to those measured before depression diagnosis, including education, income, CVD, COPD, diabetes, anxiety disorders, stress disorders, substance use disorders, and bipolar disorder.

**eTable 9.** Adjusted HR for depression and dementia by year at depression diagnosis

|                  | Depressive Disorders |             |                            | Comparison Cohort |             |                            | HR (95% CI) <sup>2</sup> | p-value |
|------------------|----------------------|-------------|----------------------------|-------------------|-------------|----------------------------|--------------------------|---------|
|                  | Events               | No. at Risk | Risk (95% CI) <sup>1</sup> | Events            | No. at Risk | Risk (95% CI) <sup>1</sup> |                          |         |
| <b>1980–1989</b> | 1,193                | 12,213      | 10.4 (9.79,11.0)           | 5,240             | 60,096      | 10.1 (9.76,10.4)           | 2.10 (1.92,2.29)         | <0.001  |
| <b>1990–1999</b> | 4,673                | 42,372      | 13.0 (12.3,13.8)           | 13,972            | 204,132     | 8.97 (8.67,9.27)           | 2.38 (2.28,2.49)         | <0.001  |
| <b>2000–2009</b> | 6,110                | 97,751      | 7.21 (7.01,7.42)           | 15,810            | 471,066     | 4.58 (4.45,4.70)           | 2.37 (2.28,2.45)         | <0.001  |
| <b>2010–2018</b> | 2,024                | 94,163      | 3.23 (3.07,3.40)           | 3,630             | 455,008     | 1.42 (1.36,1.48)           | 2.79 (2.62,2.97)         | <0.001  |

4. Risk was calculated separately for individuals with depression and members of the comparison cohort using cumulative incidence functions that treated death as a competing risk.

5. We used stratified Cox proportional hazards regression models to compute hazard ratios (HR) for the association between depression and dementia. Variables were chosen for adjustment based on current knowledge regarding common causes of depression and dementia, and restricted to those measured before depression diagnosis, including education, income, CVD, COPD, diabetes, anxiety disorders, stress disorders, substance use disorders, and bipolar disorder.

**eTable 10.** Adjusted HR for depression and dementia by dementia subtypes

|                       | Depressive Disorders |             |                            | Comparison Cohort |             |                            | HR (95% CI) <sup>2</sup> | p-value |
|-----------------------|----------------------|-------------|----------------------------|-------------------|-------------|----------------------------|--------------------------|---------|
|                       | Events               | No. at Risk | Risk (95% CI) <sup>1</sup> | Events            | No. at Risk | Risk (95% CI) <sup>1</sup> |                          |         |
| <b>Alzheimer's</b>    |                      |             |                            |                   |             |                            |                          |         |
| 1 – 10 years          | 2,745                | 246,499     | 1.36 (1.31,1.41)           | 8,825             | 1,190,302   | 0.97 (0.95,0.99)           | 1.90 (1.81,1.99)         | <0.001  |
| > 10 – 20 years       | 669                  | 95,296      | 1.18 (1.09,1.28)           | 4,720             | 534,344     | 1.45 (1.41,1.49)           | 1.27 (1.14,1.40)         | <0.001  |
| > 20 – 39 years       | 163                  | 19,206      | 3.16 (2.41,4.07)           | 1,457             | 123,570     | 3.99 (3.72,4.27)           | 1.33 (1.06,1.66)         | 0.01    |
| 1 – 39 years          | 3,577                | 246,499     | 3.86 (3.43,4.32)           | 15,002            | 1,190,302   | 4.84 (4.65,5.03)           | 1.73 (1.65,1.80)         | <0.001  |
| <b>Vascular</b>       |                      |             |                            |                   |             |                            |                          |         |
| 1 – 10 years          | 1,809                | 246,499     | 0.89 (0.85,0.93)           | 2,764             | 1,190,302   | 0.30 (0.29,0.31)           | 3.54 (3.29,3.81)         | <0.001  |
| > 10 – 20 years       | 402                  | 95,296      | 0.69 (0.62,0.77)           | 1,253             | 534,344     | 0.38 (0.36,0.40)           | 2.61 (2.21,3.07)         | <0.001  |
| > 20 – 39 years       | 84                   | 19,206      | 1.19 (0.91,1.55)           | 398               | 123,570     | 1.09 (0.91,1.29)           | 1.77 (1.24,2.51)         | 0.002   |
| 1 – 39 years          | 2,295                | 246,499     | 2.01 (1.84,2.20)           | 4,415             | 1,190,302   | 1.35 (1.23,1.48)           | 3.28 (3.07,3.50)         | <0.001  |
| <b>Other dementia</b> |                      |             |                            |                   |             |                            |                          |         |
| 1 – 10 years          | 6,220                | 246,499     | 3.10 (2.03,3.18)           | 11,831            | 1,190,302   | 1.30 (1.27,1.32)           | 2.87 (2.76,2.98)         | <0.001  |
| > 10 – 20 years       | 1,566                | 95,296      | 2.70 (2.56,2.85)           | 5,724             | 534,344     | 1.74 (1.69,1.79)           | 2.23 (2.05,2.42)         | <0.001  |
| > 20 – 39 years       | 342                  | 19,206      | 5.61 (4.88,6.40)           | 1,680             | 123,570     | 4.14 (3.86,4.42)           | 2.19 (1.83,2.61)         | <0.001  |
| 1 – 39 years          | 8,128                | 246,499     | 7.96 (7.55,8.38)           | 19,235            | 1,190,302   | 5.51 (5.32,5.71)           | 2.72 (2.63,2.81)         | <0.001  |

Risk was calculated separately for individuals with depression and members of the comparison cohort using cumulative incidence functions that treated death as a competing risk.

We used stratified Cox proportional hazards regression models to compute hazard ratios (HR) for the association between depression and dementia. Variables were chosen for adjustment based on current knowledge regarding common causes of depression and dementia, and restricted to those measured before depression diagnosis, including education, income, CVD, COPD, diabetes, anxiety disorders, stress disorders, substance use disorders, and bipolar disorder.

**eTable 11.** Adjusted HR for depression and dementia restricted to those age >45 at baseline

|                 | <b>Depression Diagnosis<br/>Risk (95% CI)</b> | <b>Comparison Cohort<br/>Risk (95% CI)</b> | <b>HR (95% CI)</b> | <b>p-value</b> |
|-----------------|-----------------------------------------------|--------------------------------------------|--------------------|----------------|
| 1 – 10 years    | 9.10 (8.94,9.27)                              | 4.48 (4.42,4.54)                           | 2.56 (2.49,2.64)   | <0.001         |
| > 10 – 20 years | 8.50 (8.16,8.84)                              | 6.23 (6.12,6.35)                           | 1.83 (1.72,1.94)   | <0.001         |
| > 20 – 39 years | 16.6 (14.6,18.8)                              | 15.3 (14.6,16.1)                           | 1.70 (1.48,1.96)   | <0.001         |
| 1 – 39 years    | 18.3 (17.6,18.9)                              | 16.0 (15.7,16.4)                           | 2.39 (2.33,2.45)   | <0.001         |

1. Risk was calculated separately for individuals with depression and members of the comparison cohort using cumulative incidence functions that treated death as a competing risk.

2. We used stratified Cox proportional hazards regression models to compute hazard ratios (HR) for the association between depression and dementia. Variables were chosen for adjustment based on current knowledge regarding common causes of depression and dementia, and restricted to those measured before depression diagnosis, including education, income, CVD, COPD, diabetes, anxiety disorders, stress disorders, substance use disorders, and bipolar disorder.

**eTable 12.** Adjusted HR for depression and dementia including the first year of follow-up

|                 | <b>Depression Diagnosis</b><br>Risk (95% CI) | <b>Comparison Cohort</b><br>Risk (95% CI) | <b>HR (95% CI)</b> | <b>p-value</b> |
|-----------------|----------------------------------------------|-------------------------------------------|--------------------|----------------|
| 0 – 10 years    | 6.68 (6.58,6.78)                             | 3.31 (3.28,3.35)                          | 3.28 (3.21,3.36)   | <0.001         |
| > 10 – 20 years | 9.62 (9.47,9.77)                             | 6.35 (6.29,6.42)                          | 3.04 (2.97,3.10)   | <0.001         |
| > 20 – 39 years | 9.82 (8.74,11.0)                             | 9.20 (8.80,9.62)                          | 1.80 (1.58,2.04)   | <0.001         |
| 0 – 39 years    | 14.2 (13.6,14.7)                             | 11.9 (11.7,12.2)                          | 2.99 (2.93,3.05)   | <0.001         |

1. Risk was calculated separately for individuals with depression and members of the comparison cohort using cumulative incidence functions that treated death as a competing risk.

2. We used stratified Cox proportional hazards regression models to compute hazard ratios (HR) for the association between depression and dementia. Variables were chosen for adjustment based on current knowledge regarding common causes of depression and dementia, and restricted to those measured before depression diagnosis, including education, income, CVD, COPD, diabetes, anxiety disorders, stress disorders, substance use disorders, and bipolar disorder

**eTable 12.** Adjusted HR for depression and dementia without censoring of comparison cohort members

|                 | <b>Depression Diagnosis</b><br>Risk (95% CI) | <b>Comparison Cohort</b><br>Risk (95% CI) | <b>HR (95% CI)</b> | <b>p-value</b> |
|-----------------|----------------------------------------------|-------------------------------------------|--------------------|----------------|
| 1 – 10 years    | 5.33 (5.23,5.43)                             | 2.69 (2.65,2.72)                          | 2.46 (2.40,2.53)   | <0.001         |
| > 10 – 20 years | 4.55 (4.37,4.74)                             | 3.78 (3.71,3.85)                          | 1.75 (1.65,1.85)   | <0.001         |
| > 20 – 39 years | 9.82 (8.74,11.0)                             | 9.42 (9.03,9.83)                          | 1.69 (1.49,1.91)   | <0.001         |
| 1 – 39 years    | 13.6 (13.0,14.2)                             | 11.9 (11.6,12.2)                          | 2.28 (2.22,2.33)   | <0.001         |

1. Risk was calculated separately for individuals with depression and members of the comparison cohort using cumulative incidence functions that treated death as a competing risk.

2. We used stratified Cox proportional hazards regression models to compute hazard ratios (HR) for the association between depression and dementia. Variables were chosen for adjustment based on current knowledge regarding common causes of depression and dementia, and restricted to those measured before depression diagnosis, including education, income, CVD, COPD, diabetes, anxiety disorders, stress disorders, substance use disorders, and bipolar disorder
