# Supplementary material
Source: PubMed Central journal article supplement (PMC10366950)
Supplement: jamaneurol-e232309-s002.pdf [file jamaneurol-e232309-s002.pdf]

## Data Sharing Statement

Elser. Association of Early-, Middle-, and Late-Life Depression With Incident Dementia in a Danish Cohort. *JAMA Neurol.* Published July 24, 2023. doi:10.1001/jamaneurol.2023.2309

### Data

**Data available:** No

### Additional Information

**Explanation for why data not available:** These data will not be shared due to their sensitive nature, but are available to qualified investigators for re-analysis upon reasonable request.
